# Supplementary material
Source: publisher figshare collection journal article supplement (https://acs.figshare.com/ndownloader/files/24028724)
Supplement: Supplementary file 1 [file 24028724]

## **Supplementary Information for: Low Temperature Scalable Deposition of Copper (I) Thiocyanate Films via Aerosol-Assisted Chemical Vapour Deposition**

Lokeshwari Mohan<sup>1,2</sup>, Sinclair R. Ratnasingham<sup>1,2</sup>, Julianna Panidi<sup>3</sup>, Thomas D. Anthopoulos<sup>4</sup>, Russell Binions<sup>†,2</sup>, Martyn A. McLachlan<sup>1</sup> and Joe Briscoe<sup>2\*</sup>

<sup>1</sup> Department of Materials and Centre for Plastic Electronics, Imperial College London, South Kensington, London SW7 2AZ, United Kingdom

<sup>2</sup> School of Engineering and Materials Science and Materials Research Institute, Queen Mary University of London, Mile End Road, London E1 4NS, United Kingdom

<sup>3</sup> Department of Physics and Centre for Plastic Electronics, Imperial College London, South Kensington, London SW7 2AZ, United Kingdom

<sup>4</sup> Division of Physical Sciences and Engineering, King Abdullah University of Science and Technology (KAUST), Thuwal 23955-6900, Saudi Arabia

<sup>†</sup>Author deceased

\*[j.briscoe@qmul.ac.uk](mailto:j.briscoe@qmul.ac.uk)

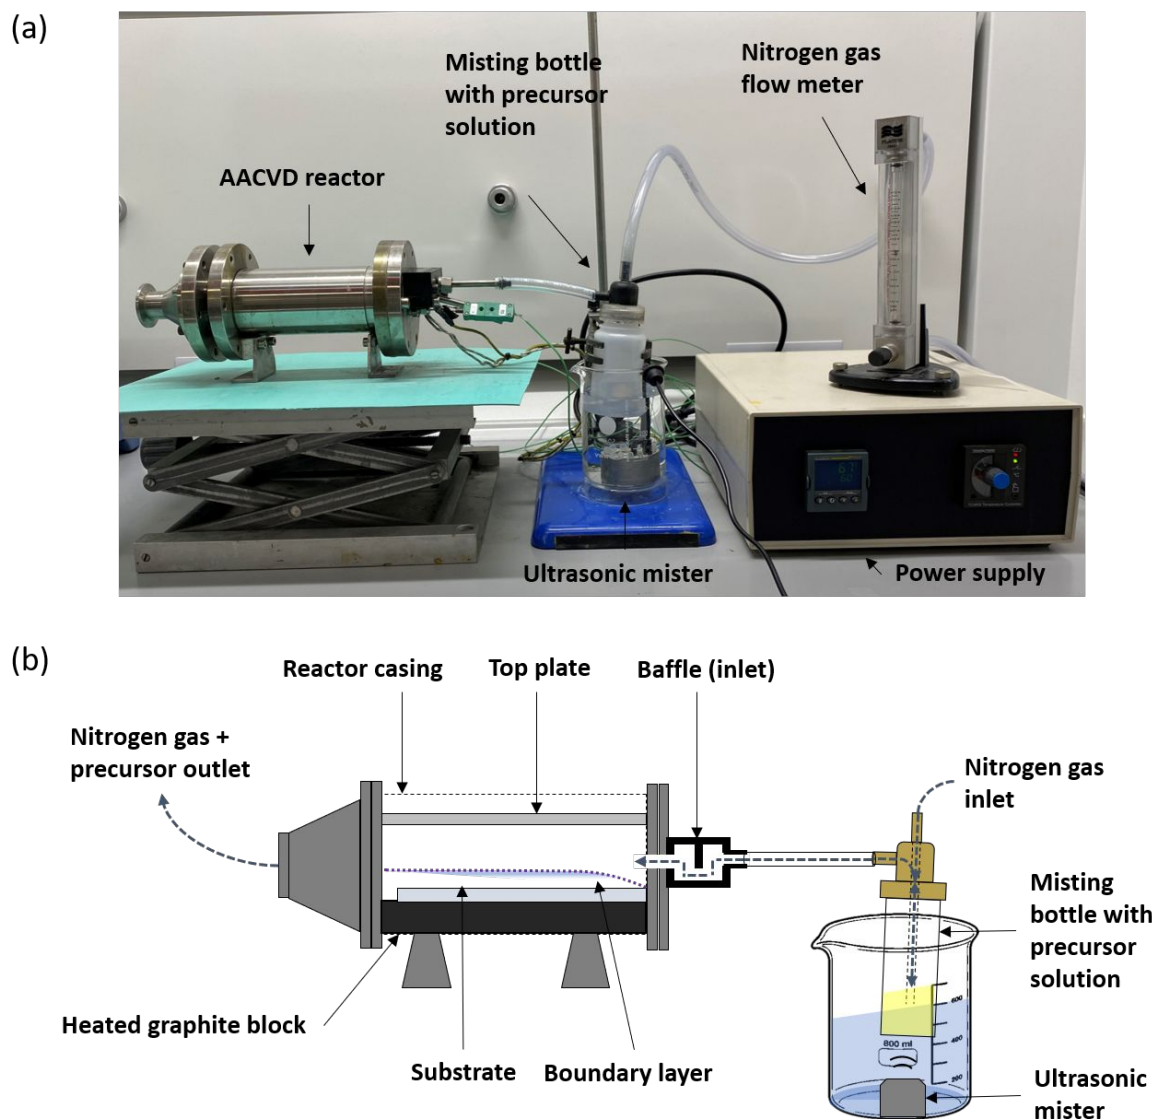

Figure S1- Photograph (a) and schematic (b) of AACVD experimental set-up.

The aerosol-assisted chemical vapour deposition (AACVD) reactor is made of stainless steel and the baffle, precursor inlet, are made of naval brass. Both materials are resistant to copper (I) thiocyanate ( $\text{CuSCN}$ ) and the solvent, diethyl sulfide (DES). The precursor aerosols enter the reactor via a custom-made baffle designed to promote laminar flow. The reactor chamber (17 x 6 cm) consists of a heated graphite block (15 x 5 cm) which the substrate is placed on. In this study, the temperature is controlled via the graphite block to ensure deposition is dominated at the substrate surface. The set-up is placed in a fumehood to prevent exposure to precursor aerosols.

FTO

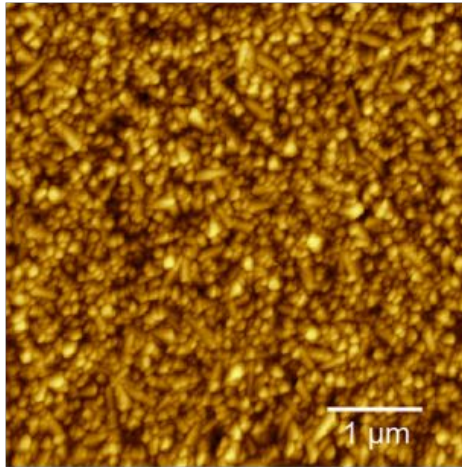

RMS= 18.10 nm  
Z= 120 nm

CuSCN on FTO

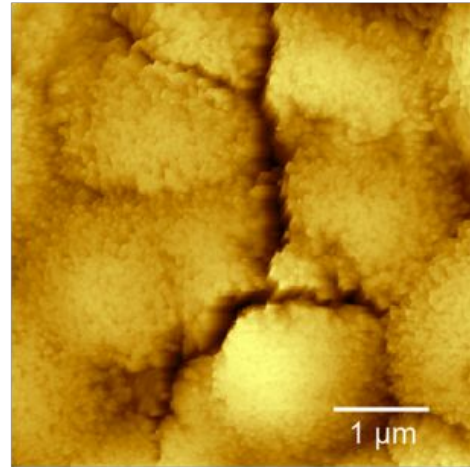

RMS= 92.34 nm  
Z= 650 nm

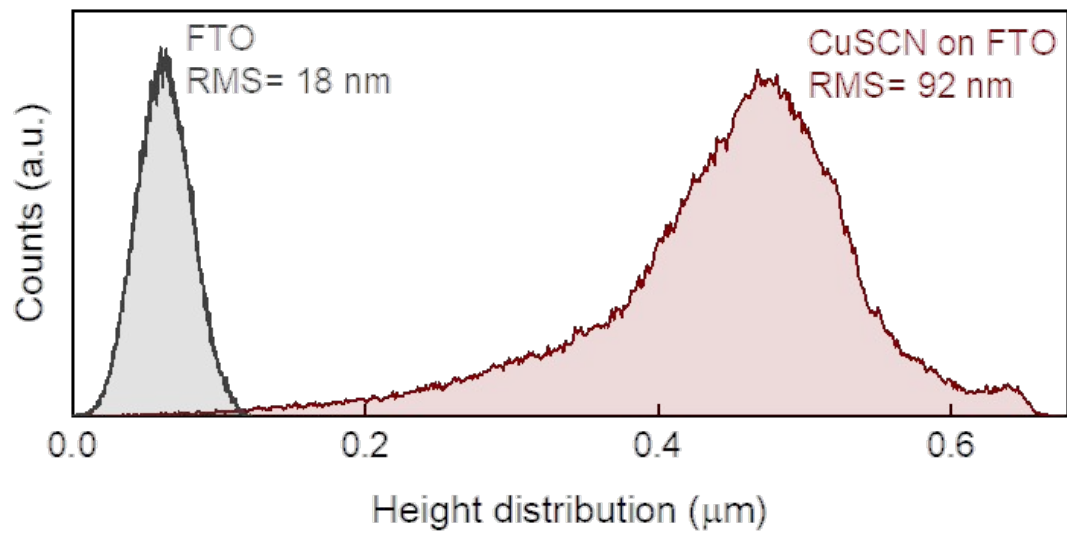

Figure S2. AFM images and their corresponding surface height distributions indicating root mean square (RMS) roughness of FTO (18.10 nm) and CuSCN on FTO (92.34 nm).

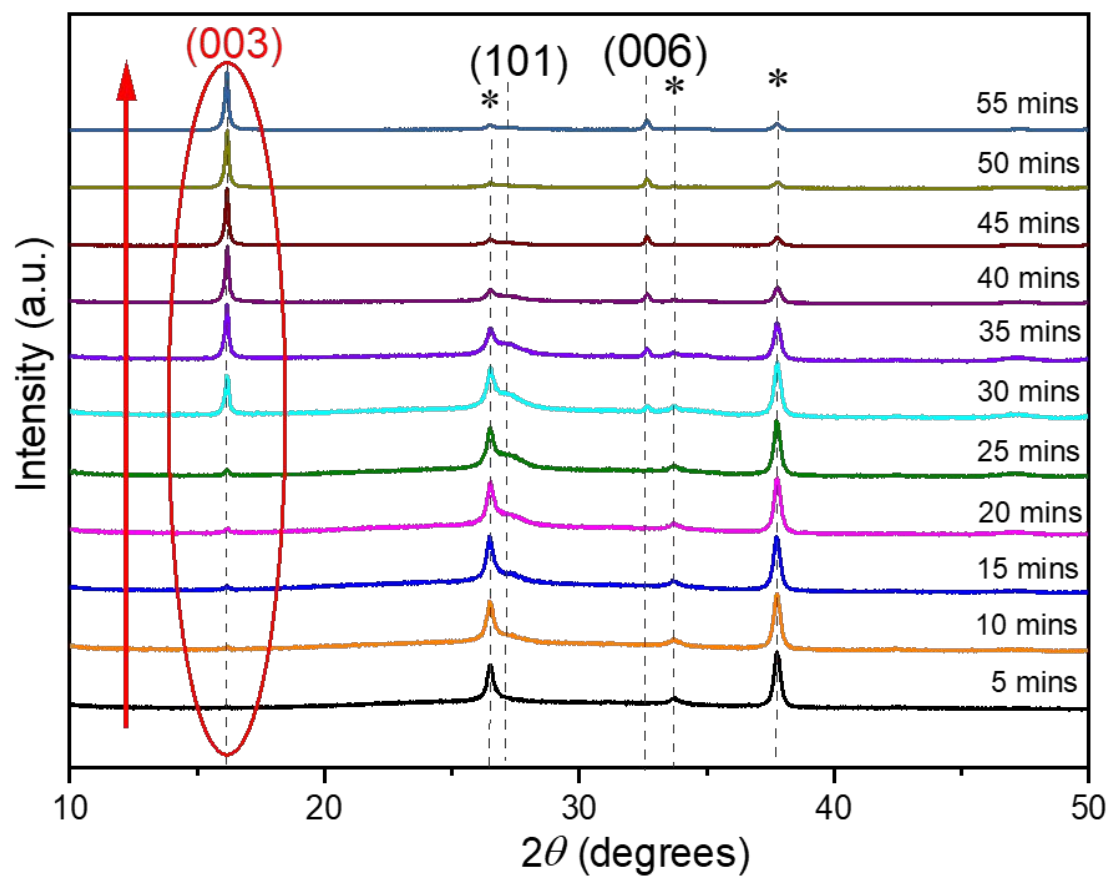

Figure S3. X-ray diffraction patterns of the film at 5-minute time intervals showing an increase in main (003) CuSCN peak with continual deposition. 25, 35 and 45 mg/ml follow the same trend with more CuSCN being deposited with time. Peaks labelled with an asterisk correspond to FTO.
